# Supplementary material
Source: PubMed Central journal article supplement (PMC3523311)

## Supporting Information Figure Legends

**Figure S1. Lack of dehydration during eRING testing and fly water content.** (A) Wet weight (per fly) before and after eRING testing in Canton-S females (CS F), Canton-S males (CS M), and females of *w[CS]*, *mys<sup>ts2</sup>* and *scb<sup>Vol2</sup>*. Wet weight was not altered by eRING testing (two-way ANOVA, n.s., n=5-10 groups of 25 flies/genotype and sex). Wet weight was affected by genotype and sex (two-way ANOVA,  $p < 0.0001$ ). (B) Water content in control female and male flies. Genetic background had no effect on water content (two-way ANOVA, n.s., n=5 groups of 25 flies/background and sex). Water content was greater in females than in males (two-way ANOVA,  $p < 0.0001$ ). (C) Water content in control and integrin mutant females was affected by genotype (one-way ANOVA,  $p < 0.0001$ , n = 10-16 groups of 25 flies/genotype). Water content in *w[CS]* was indistinguishable from *mys<sup>ts2/+</sup>*, but greater in all other genotypes (Bonferroni's multiple comparison test,  $p < 0.05$ ).

**Figure S2. Negative geotaxis in the absence of ethanol in *mys* and *scb* mutant flies.**

Negative geotaxis in *mys* (A), *scb* (B) and *mys;scb* double mutants (C) was not different than in *w[CS]* control flies (individual one-way ANOVAs, n.s.; n = 10) when tested in eRING assays with vehicle (water) alone. Data are mean  $\pm$  S.E.M. and were compiled from 3 or more experiments with a total of 10 vials of 25 flies/vial.

**Figure S3. Internal ethanol concentrations during eRING tests in *mys* and *scb* mutants.**

Internal ethanol concentrations in *w[CS]* control and *mys* (A), *scb* (B) and *mys;scb* double mutants (C) increased with exposure time to vapor from a 50% ethanol solution (two-way ANOVA,  $p < 0.0001$ ), but were indistinguishable during a first (E) and second (EE) exposure (n.s.). In panel A, genotype had an overall effect on internal ethanol concentrations ( $p = 0.0017$ ), but internal ethanol concentrations in *w[CS]* controls were different only in *mys<sup>ts2</sup>* and

$mys^{XG/+}$  at 30 minutes of exposure (\*, Bonferroni's multiple comparison,  $p < 0.05$ ). Genotype had no significant effect in *scb* (B) or *mys;scb* double mutants (C) (n.s.). Data in all panels is derived from 18 vials of 25 flies per genotype.

**Figure S4. Ethanol sensitivity during a second exposure to the drug in *mys* and *scb* mutant flies.** Sensitivity (T50) to a second exposure to ethanol vapor from a 50% solution was significantly affected by genotype in (A) *mys*, (B) *scb* and (C) *mys;scb* double mutants (individual one-way ANOVAs,  $p < 0.0001$ ,  $n = 10-30$  per genotype). Bonferroni's multiple comparison tests revealed that *mys<sup>ts2</sup>/mys<sup>XG</sup>* was more sensitive than w[CS] controls (\* $p < 0.05$ , panel A) and that *scb<sup>Vol1</sup>/+* and *scb<sup>Vol2</sup>/+* were less sensitive to ethanol compared to w[CS] controls (\* $p < 0.05$ , panels B and C). Data (mean  $\pm$  S.E.M.) were compiled from 3 or more experiments with a total of 10-30 vials of 25 flies/vial.

# Bhandari et al, Figure S1

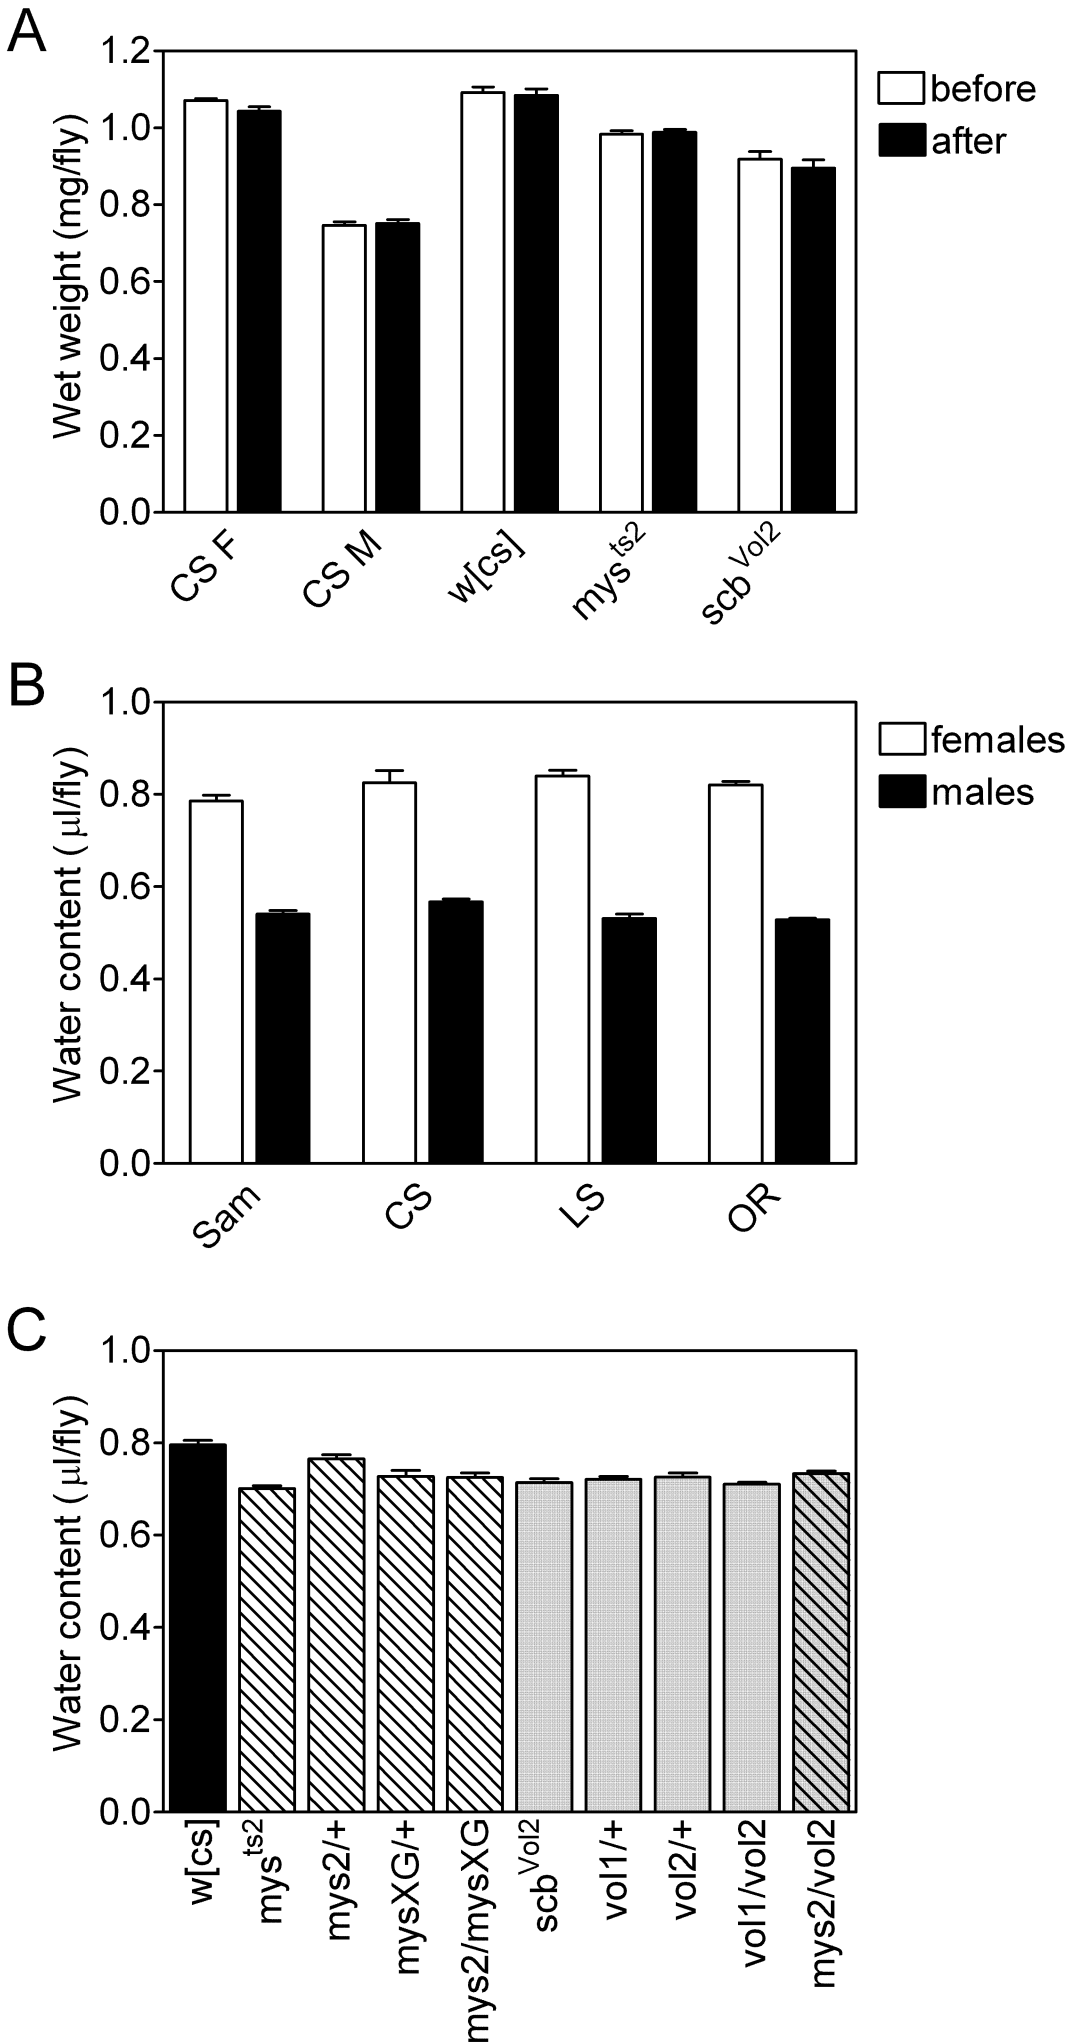

# Bhandari et al Figure S2

## A

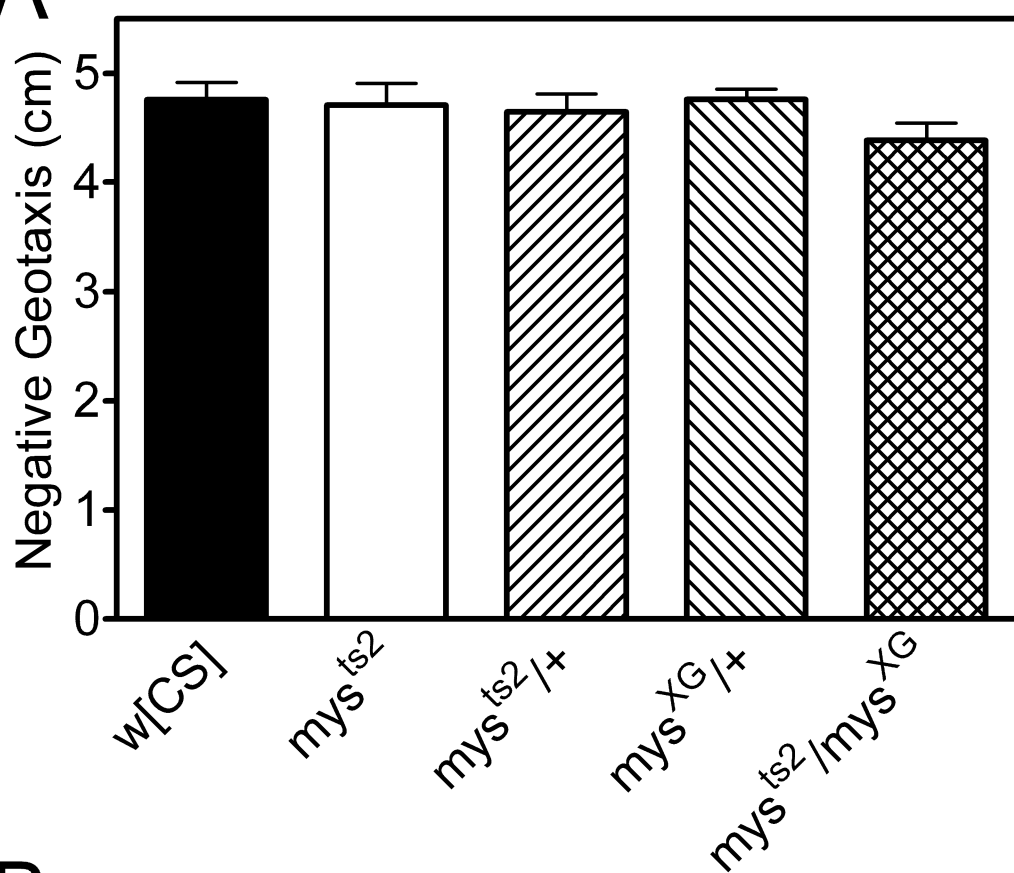

## B

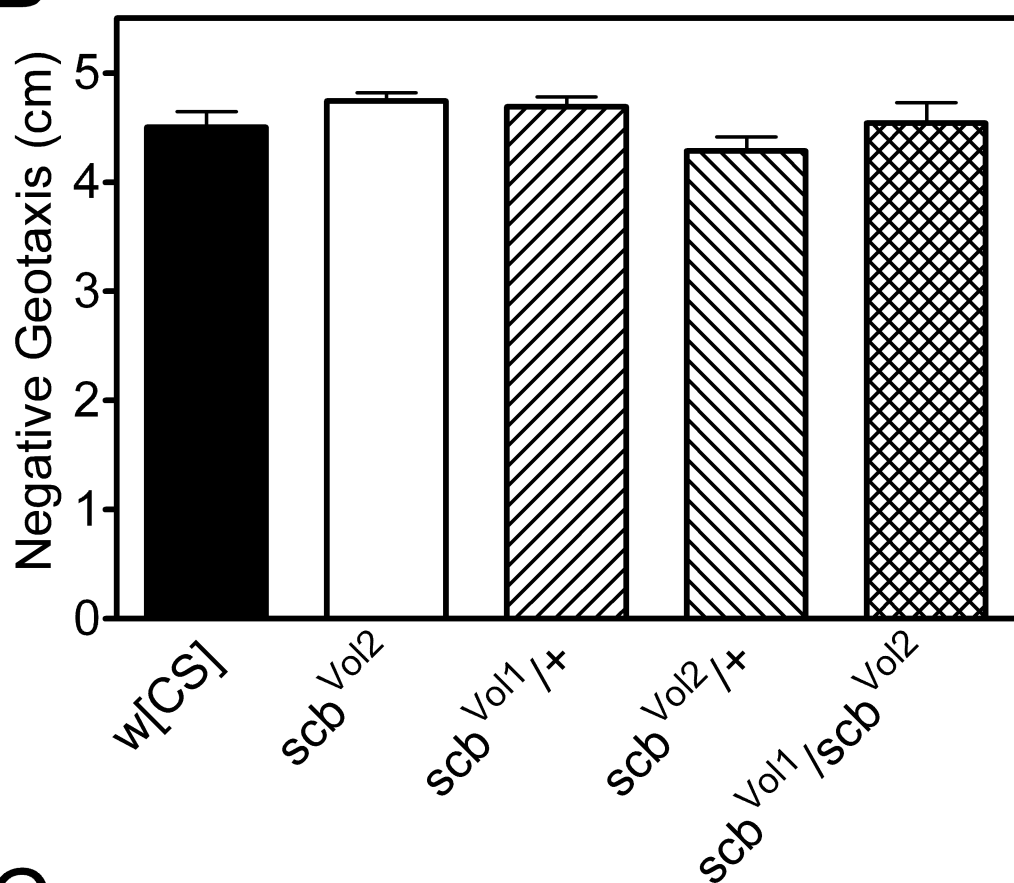

## C

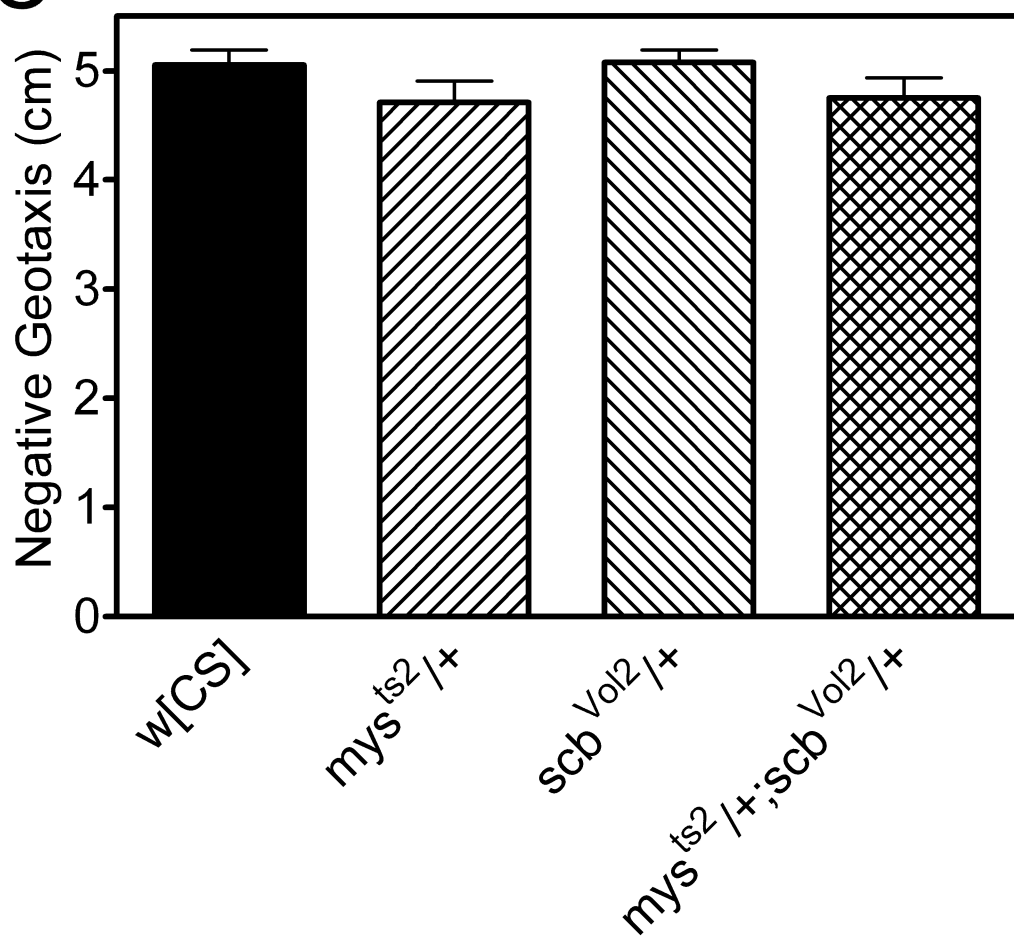

# Bhandari et al Figure S3

## A

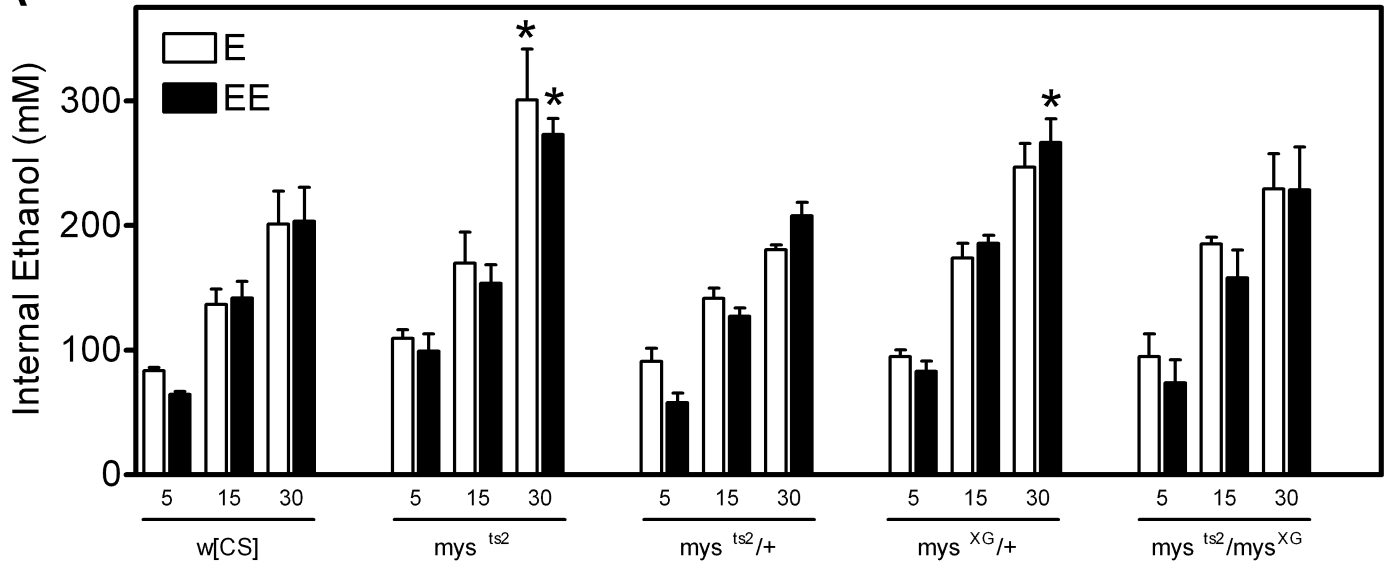

## B

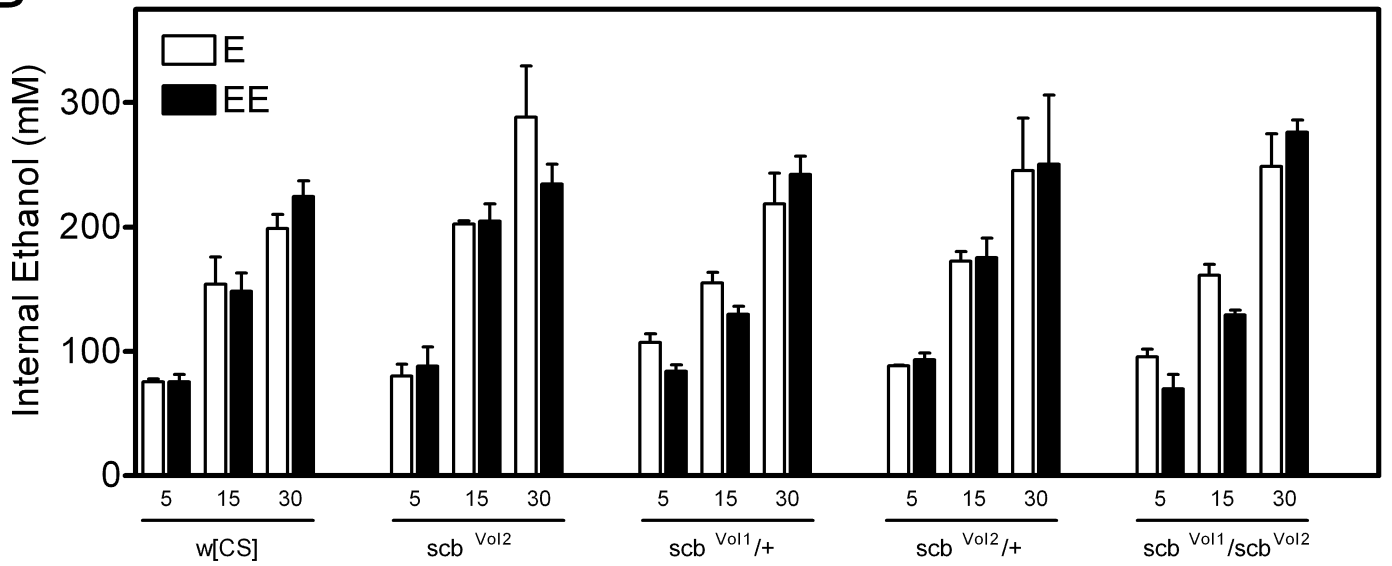

## C

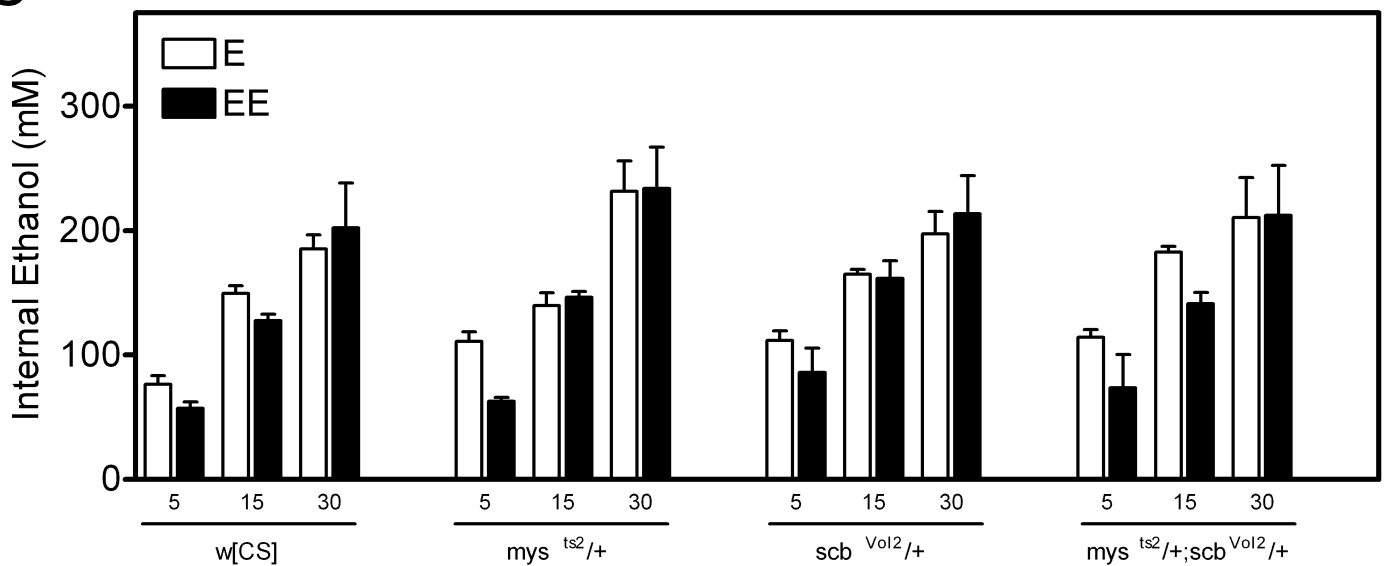

# Bhandari et al Figure S4

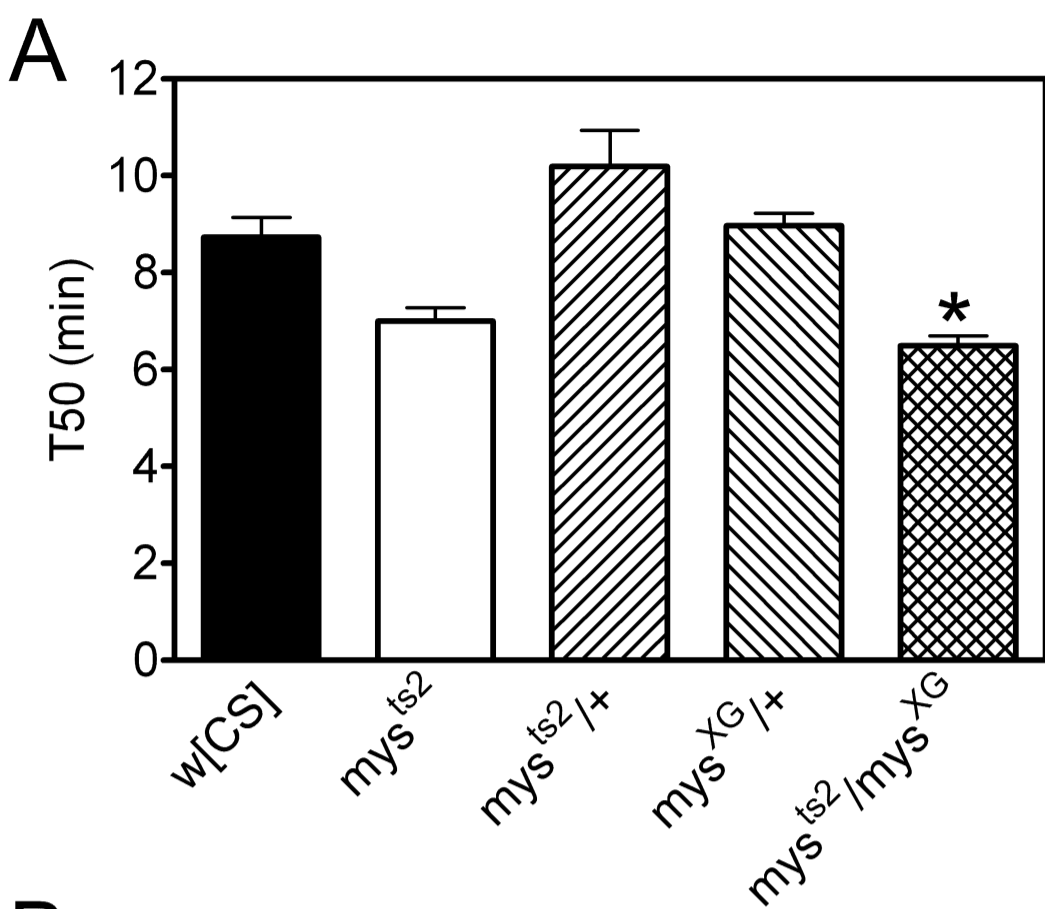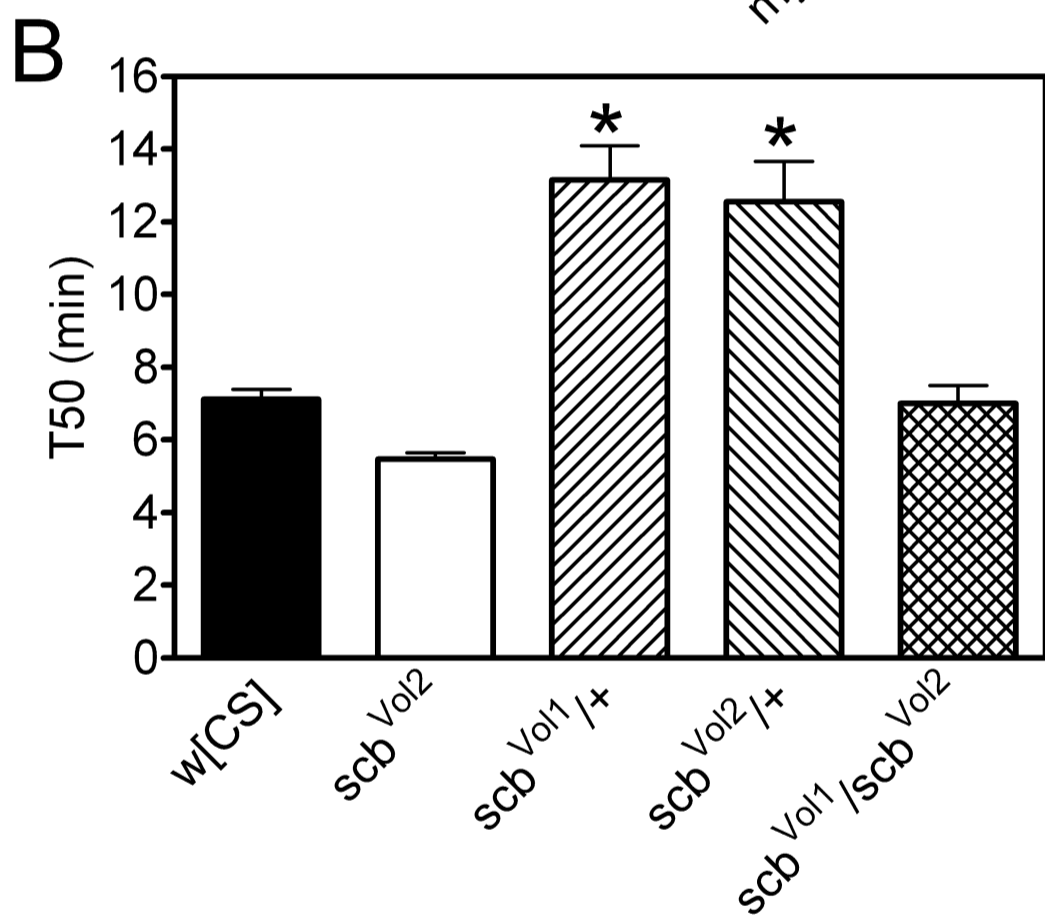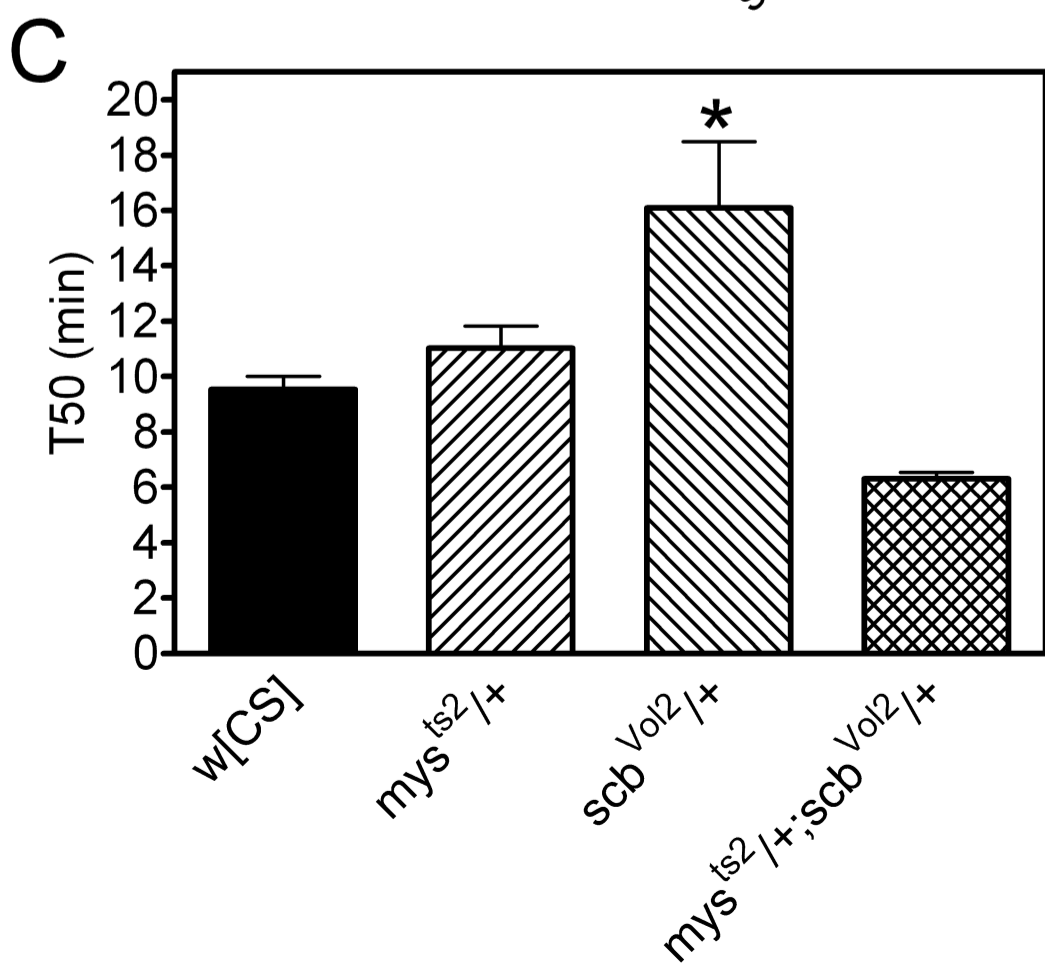

Supplement: NIHMS425838-supplement-01.pdf [file NIHMS425838-supplement-01.pdf]
